# Supplementary material for: Investigating Molecular Signatures Underlying Trapeziometacarpal Osteoarthritis Through the Evaluation of Systemic Cytokine Expression
Source: Frontiers journal article supplement (doi:10.3389/fimmu.2021.794792), 2022-01-20

Supplementary Figure 1

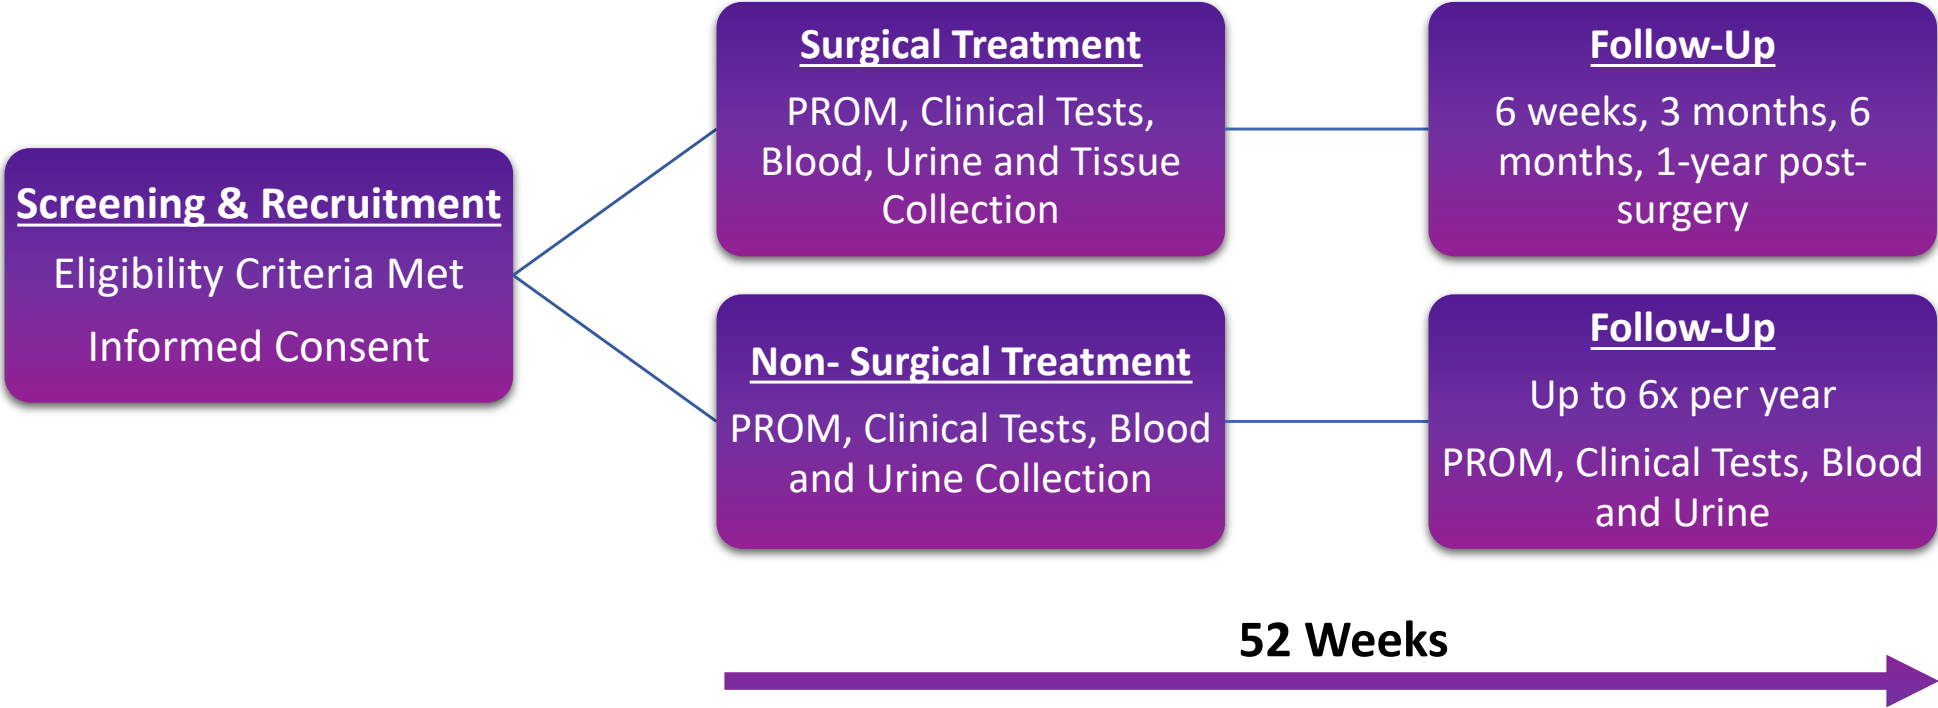

Supplement: Image_1.PDF [file Image_1.PDF]
