# Supplementary material for: Investigating Molecular Signatures Underlying Trapeziometacarpal Osteoarthritis Through the Evaluation of Systemic Cytokine Expression
Source: Front Immunol. 2022 Jan 20;12:794792. doi: 10.3389/fimmu.2021.794792 (PMC8814933; doi:10.3389/fimmu.2021.794792)
Supplement: Supplementary Table 6 — Baseline Data. Baseline data for surgical and non-surgical patients, including clinical characteristics, PROM, functional scores and baseline cytokine measurements (pg/ml) are reported. [file Table_6.xlsx]

## Sheet: Sheet 1 - Untransformed Data TM
Untransformed Data TMOA
group.tx	id.use	merge.id	ID	pc1.clust	AGE	GENDER	BMI	BL_QDASH_SCORE	VAS	BL_TASD_SCORE	BL_SUBSCALE_SYMPTOM	BL_SUBSCALE_DISABILITY	XRAY.grade	BL_Pinch	BL_Grip	1.5Month_QDASH_SCORE	3Month_QDASH_SCORE	6MONTH_QDASH_SCORE	1YEAR_QDASH_SCORE	1.5Month_EQ_VAS	3MONTH_EQ_VAS	6MONTH_EQ_VAS	1YEAR_EQ_VAS	1.5Month_TASD_SCORE	1.5Month_SUBSCALE_SYMPTOM	1.5Month_SUBSCALE_DISABILITY	3M_TASD_SCORE	3M_SUBSCALE_SYMPTOM	3M_SUBSCALE_DISABILITY	6M_TASD_SCORE	6M_SUBSCALE_SYMPTOM	6M_SUBSCALE_DISABILITY	1Y_TASD_SCORE	1Y_SUBSCALE_SYMPTOM	1Y_SUBSCALE_DISABILITY	3M_Pinch	3M_Grip	6M_Pinch	6M_Grip	1Y_Pinch	1Y_Grip	Total.Joint.Count	PCA.cluster	Patient	group	bFGF	G.CSF	Eotaxin	GM.CSF
NS	1: NS	NS-1	1	0	82.3333	FEMALE	26.6315	34.0909	58	45.8333	42.8571	50	3	4.16667	17.3333	NA	NA	NA	NA	NA	NA	NA	NA	NA	NA	NA	NA	NA	NA	NA	NA	NA	NA	NA	NA	NA	NA	NA	NA	NA	NA	9	Cluster 1	1	Non-Surgical	35.91	157.61	35.52	0
NS	109: NS	NS-109	109	0	64.5	FEMALE	23.2182	27.2727	92	29.1667	39.2857	15	3	5.16667	21.6667	NA	NA	NA	NA	NA	NA	NA	NA	NA	NA	NA	NA	NA	NA	NA	NA	NA	NA	NA	NA	NA	NA	NA	NA	NA	NA	10	Cluster 1	109	Non-Surgical	10.64	71.31	28.66	0
NS	110: NS	NS-110	110	0	54.5833	FEMALE	23.5883	77.2727	69	75	64.2857	90	NA	2.5	17.3333	NA	NA	NA	NA	NA	NA	NA	NA	NA	NA	NA	NA	NA	NA	NA	NA	NA	NA	NA	NA	NA	NA	NA	NA	NA	NA	15	Cluster 1	110	Non-Surgical	9.08	113.65	58.07	0
NS	111: NS	NS-111	111	0	65	FEMALE	27.6353	20.4545	51	29.1667	28.5714	30	NA	6.16667	30	NA	NA	NA	NA	NA	NA	NA	NA	NA	NA	NA	NA	NA	NA	NA	NA	NA	NA	NA	NA	NA	NA	NA	NA	NA	NA	0	Cluster 1	111	Non-Surgical	9.08	76.43	23.34	0
NS	113: NS	NS-113	113	1	66.3333	FEMALE	25.0174	9.09091	90	12.5	17.8571	5	2	6	33	NA	NA	NA	NA	NA	NA	NA	NA	NA	NA	NA	NA	NA	NA	NA	NA	NA	NA	NA	NA	NA	NA	NA	NA	NA	NA	0	Cluster 2	113	Non-Surgical	8.01	0	57.14	0
NS	116: NS	NS-116	116	0	68.3333	MALE	31.6639	11.3636	48	14.5833	17.8571	10	4	10.1667	47.3333	NA	NA	NA	NA	NA	NA	NA	NA	NA	NA	NA	NA	NA	NA	NA	NA	NA	NA	NA	NA	NA	NA	NA	NA	NA	NA	5	Cluster 1	116	Non-Surgical	15.07	35	65.48	0
NS	119: NS	NS-119	119	0	49.5	FEMALE	29.1802	75	55	91.6667	89.2857	95	NA	3.66667	8	NA	NA	NA	NA	NA	NA	NA	NA	NA	NA	NA	NA	NA	NA	NA	NA	NA	NA	NA	NA	NA	NA	NA	NA	NA	NA	16	Cluster 1	119	Non-Surgical	16.88	32.55	148.5	0
NS	120: NS	NS-120	120	0	66.75	FEMALE	24.9611	40.9091	75	37.5	39.2857	35	3	4	20.6667	NA	NA	NA	NA	NA	NA	NA	NA	NA	NA	NA	NA	NA	NA	NA	NA	NA	NA	NA	NA	NA	NA	NA	NA	NA	NA	13	Cluster 1	120	Non-Surgical	21.87	50.73	83.99	0
NS	121: NS	NS-121	121	0	79.6667	FEMALE	23.6183	22.7273	94	35.4167	28.5714	45	3	5.33333	19.3333	NA	NA	NA	NA	NA	NA	NA	NA	NA	NA	NA	NA	NA	NA	NA	NA	NA	NA	NA	NA	NA	NA	NA	NA	NA	NA	8	Cluster 1	121	Non-Surgical	16.88	53.52	132.19	0
NS	122: NS	NS-122	122	1	60.1667	MALE	25.802	27.2727	96	47.9167	53.5714	40	3	10.3333	42.3333	NA	NA	NA	NA	NA	NA	NA	NA	NA	NA	NA	NA	NA	NA	NA	NA	NA	NA	NA	NA	NA	NA	NA	NA	NA	NA	7	Cluster 2	122	Non-Surgical	12.48	0	84.83	0
NS	127: NS	NS-127	127	0	68.25	FEMALE	19.5297	52.2727	88	31.25	21.4286	45	3	3.83333	10.3333	NA	NA	NA	NA	NA	NA	NA	NA	NA	NA	NA	NA	NA	NA	NA	NA	NA	NA	NA	NA	NA	NA	NA	NA	NA	NA	18	Cluster 1	127	Surgical	17.47	6.36	66.4	0
NS	130: NS	NS-130	130	1	49.6667	FEMALE	24.5332	45.4545	65	50	64.2857	30	3	4.5	16.3333	NA	NA	NA	NA	NA	NA	NA	NA	NA	NA	NA	NA	NA	NA	NA	NA	NA	NA	NA	NA	NA	NA	NA	NA	NA	NA	12	Cluster 2	130	Non-Surgical	8.01	0	44.22	0
NS	131: NS	NS-131	131	0	48.5	FEMALE	27.4637	59.0909	85	72.9167	67.8571	80	3	3.33333	21.6667	NA	NA	NA	NA	NA	NA	NA	NA	NA	NA	NA	NA	NA	NA	NA	NA	NA	NA	NA	NA	NA	NA	NA	NA	NA	NA	2	Cluster 1	131	Non-Surgical	10.36	28.57	77.21	0
NS	137: NS	NS-137	137	1	57.6667	FEMALE	25.1299	45.4545	60	41.6667	28.5714	60	3	7	34.6667	NA	NA	NA	NA	NA	NA	NA	NA	NA	NA	NA	NA	NA	NA	NA	NA	NA	NA	NA	NA	NA	NA	NA	NA	NA	NA	5	Cluster 2	137	Non-Surgical	8.01	0	18.78	0
NS	138: NS	NS-138	138	0	63.3333	MALE	28.7478	52.2727	61	47.9167	39.2857	60	2	3.66667	35.3333	NA	NA	NA	NA	NA	NA	NA	NA	NA	NA	NA	NA	NA	NA	NA	NA	NA	NA	NA	NA	NA	NA	NA	NA	NA	NA	12	Cluster 1	138	Non-Surgical	28.02	71.31	48.02	0
NS	140: NS	NS-140	140	0	64.8333	FEMALE	NA	NA	67	64.5833	75	50	3	7.83333	21.6667	NA	NA	NA	NA	NA	NA	NA	NA	NA	NA	NA	NA	NA	NA	NA	NA	NA	NA	NA	NA	NA	NA	NA	NA	NA	NA	23	Cluster 1	140	Non-Surgical	21.06	30.39	53.27	0
NS	141: NS	NS-141	141	0	72.75	FEMALE	21.9481	31.8182	76	35.4167	35.7143	35	4	1.33333	10	NA	NA	NA	NA	NA	NA	NA	NA	NA	NA	NA	NA	NA	NA	NA	NA	NA	NA	NA	NA	NA	NA	NA	NA	NA	NA	13	Cluster 1	141	Non-Surgical	26.68	29.4	51.2	0
NS	143: NS	NS-143	143	0	53.25	MALE	29.2888	29.5455	90	45.8333	57.1429	30	3	7.66667	42	NA	NA	NA	NA	NA	NA	NA	NA	NA	NA	NA	NA	NA	NA	NA	NA	NA	NA	NA	NA	NA	NA	NA	NA	NA	NA	9	Cluster 1	143	Non-Surgical	87.03	51.68	39.41	0
NS	144: NS	NS-144	144	0	66.9167	FEMALE	28.3814	54.5455	75	62.5	64.2857	60	4	7	26.6667	NA	NA	NA	NA	NA	NA	NA	NA	NA	NA	NA	NA	NA	NA	NA	NA	NA	NA	NA	NA	NA	NA	NA	NA	NA	NA	5	Cluster 1	144	Non-Surgical	48.25	32.35	35.41	0
NS	148: NS	NS-148	148	0	61.5833	MALE	9.32389	47.7273	80	37.5	35.7143	40	4	8.5	29.6667	NA	NA	NA	NA	NA	NA	NA	NA	NA	NA	NA	NA	NA	NA	NA	NA	NA	NA	NA	NA	NA	NA	NA	NA	NA	NA	10	Cluster 1	148	Non-Surgical	17.26	17.83	50.93	0
NS	149: NS	NS-149	149	1	64.1667	FEMALE	21.3052	34.0909	85	47.9167	42.8571	55	2	5.83333	28.6667	NA	NA	NA	NA	NA	NA	NA	NA	NA	NA	NA	NA	NA	NA	NA	NA	NA	NA	NA	NA	NA	NA	NA	NA	NA	NA	7	Cluster 2	149	Non-Surgical	11.33	0	31.42	0
NS	152: NS	NS-152	152	0	72.5833	FEMALE	30.5138	36.3636	84	47.9167	35.7143	65	4	2.16667	8.33333	NA	NA	NA	NA	NA	NA	NA	NA	NA	NA	NA	NA	NA	NA	NA	NA	NA	NA	NA	NA	NA	NA	NA	NA	NA	NA	3	Cluster 1	152	Non-Surgical	16.46	10.62	35.41	0
NS	153: NS	NS-153	153	0	68	MALE	28.1917	34.0909	22	39.5833	39.2857	40	3	8.16667	37.3333	NA	NA	NA	NA	NA	NA	NA	NA	NA	NA	NA	NA	NA	NA	NA	NA	NA	NA	NA	NA	NA	NA	NA	NA	NA	NA	7	Cluster 1	153	Non-Surgical	30.62	50.8	47.04	0
NS	154: NS	NS-154	154	0	64.3333	FEMALE	22.3142	43.1818	90	47.9167	42.8571	55	4	5.5	27.3333	NA	NA	NA	NA	NA	NA	NA	NA	NA	NA	NA	NA	NA	NA	NA	NA	NA	NA	NA	NA	NA	NA	NA	NA	NA	NA	23	Cluster 1	154	Non-Surgical	14.82	21.14	32.4	0
NS	156: NS	NS-156	156	0	67.5	FEMALE	21.9658	29.5455	96	25	17.8571	35	4	5.16667	26	NA	NA	NA	NA	NA	NA	NA	NA	NA	NA	NA	NA	NA	NA	NA	NA	NA	NA	NA	NA	NA	NA	NA	NA	NA	NA	4	Cluster 1	156	Non-Surgical	28.02	43.62	54.4	0
NS	19: NS	NS-19	19	0	72.4167	FEMALE	25.1788	13.6364	89	18.75	17.8571	20	3	5	12.3333	NA	NA	NA	NA	NA	NA	NA	NA	NA	NA	NA	NA	NA	NA	NA	NA	NA	NA	NA	NA	NA	NA	NA	NA	NA	NA	5	Cluster 1	19	Non-Surgical	17.76	149.42	52.15	0
NS	31: NS	NS-31	31	1	70.3333	MALE	22.1509	25	92	14.5833	10.7143	20	3	6.83333	24.6667	NA	NA	NA	NA	NA	NA	NA	NA	NA	NA	NA	NA	NA	NA	NA	NA	NA	NA	NA	NA	NA	NA	NA	NA	NA	NA	5	Cluster 2	31	Non-Surgical	14.95	0	34.71	0
NS	42: NS	NS-42	42	1	83.8333	MALE	25.6312	38.6364	61	33.3333	32.1429	35	4	6	24	NA	NA	NA	NA	NA	NA	NA	NA	NA	NA	NA	NA	NA	NA	NA	NA	NA	NA	NA	NA	NA	NA	NA	NA	NA	NA	14	Cluster 2	42	Non-Surgical	7.07	0	60.92	0
NS	54: NS	NS-54	54	0	63.8333	FEMALE	26.2204	20.4545	90	20.8333	17.8571	25	2	6.34267	23.3333	NA	NA	NA	NA	NA	NA	NA	NA	NA	NA	NA	NA	NA	NA	NA	NA	NA	NA	NA	NA	NA	NA	NA	NA	NA	NA	NA	Cluster 1	54	Non-Surgical	16.88	36.95	91.1	0
NS	59: NS	NS-59	59	1	52.75	FEMALE	25.7931	38.6364	61	52.0833	39.2857	70	4	4.83333	26.3333	NA	NA	NA	NA	NA	NA	NA	NA	NA	NA	NA	NA	NA	NA	NA	NA	NA	NA	NA	NA	NA	NA	NA	NA	NA	NA	9	Cluster 2	59	Non-Surgical	0	0	40.22	0
NS	64: NS	NS-64	64	1	74.4167	FEMALE	24.889	25	72	37.5	35.7143	40	4	4	15	NA	NA	NA	NA	NA	NA	NA	NA	NA	NA	NA	NA	NA	NA	NA	NA	NA	NA	NA	NA	NA	NA	NA	NA	NA	NA	10	Cluster 2	64	Non-Surgical	4.94	0	33.7	0
NS	66: NS	NS-66	66	1	74.6667	MALE	32.7756	52.2727	75	60.4167	53.5714	70	3	9.66667	35.6667	NA	NA	NA	NA	NA	NA	NA	NA	NA	NA	NA	NA	NA	NA	NA	NA	NA	NA	NA	NA	NA	NA	NA	NA	NA	NA	6	Cluster 2	66	Non-Surgical	13.58	0	58.91	0
NS	67: NS	NS-67	67	1	68.4167	FEMALE	36.8059	31.8182	93	41.6667	42.8571	40	3	5.5	31	NA	NA	NA	NA	NA	NA	NA	NA	NA	NA	NA	NA	NA	NA	NA	NA	NA	NA	NA	NA	NA	NA	NA	NA	NA	NA	24	Cluster 2	67	Non-Surgical	13.58	0	40.13	0
NS	69: NS	NS-69	69	1	41.9167	FEMALE	20.8507	54.5455	50	77.0833	82.1429	70	3	1.83333	12.6667	NA	NA	NA	NA	NA	NA	NA	NA	NA	NA	NA	NA	NA	NA	NA	NA	NA	NA	NA	NA	NA	NA	NA	NA	NA	NA	15	Cluster 2	69	Non-Surgical	0	0	53.23	0
NS	72: NS	NS-72	72	0	41.5	MALE	21.2928	29.5455	62	47.9167	60.7143	30	3	9.66667	36.6667	NA	NA	NA	NA	NA	NA	NA	NA	NA	NA	NA	NA	NA	NA	NA	NA	NA	NA	NA	NA	NA	NA	NA	NA	NA	NA	2	Cluster 1	72	Non-Surgical	13.58	38.37	65.71	0
NS	78: NS	NS-78	78	1	49.5	FEMALE	27.4385	15.9091	70	22.9167	28.5714	15	3	1	16	NA	NA	NA	NA	NA	NA	NA	NA	NA	NA	NA	NA	NA	NA	NA	NA	NA	NA	NA	NA	NA	NA	NA	NA	NA	NA	30	Cluster 2	78	Non-Surgical	13.58	0	31.86	0
NS	79: NS	NS-79	79	1	48.9167	FEMALE	22.4996	13.6364	90	16.6667	17.8571	15	2	4.83333	19	NA	NA	NA	NA	NA	NA	NA	NA	NA	NA	NA	NA	NA	NA	NA	NA	NA	NA	NA	NA	NA	NA	NA	NA	NA	NA	9	Cluster 2	79	Non-Surgical	12.13	0	26.21	0
NS	82: NS	NS-82	82	0	65.4167	FEMALE	26.0396	52.2727	50	35.4167	25	50	2	2.16667	15	NA	NA	NA	NA	NA	NA	NA	NA	NA	NA	NA	NA	NA	NA	NA	NA	NA	NA	NA	NA	NA	NA	NA	NA	NA	NA	19	Cluster 1	82	Non-Surgical	10.64	84.03	37.98	0
NS	84: NS	NS-84	84	0	59.8333	MALE	23.8716	22.7273	86	39.5833	42.8571	35	3	8.33333	42.6667	NA	NA	NA	NA	NA	NA	NA	NA	NA	NA	NA	NA	NA	NA	NA	NA	NA	NA	NA	NA	NA	NA	NA	NA	NA	NA	2	Cluster 1	84	Non-Surgical	15.02	144.71	60.32	0
NS	87: NS	NS-87	87	0	42.3333	FEMALE	28.3425	79.5455	21	62.5	64.2857	60	2	3	12.3333	NA	NA	NA	NA	NA	NA	NA	NA	NA	NA	NA	NA	NA	NA	NA	NA	NA	NA	NA	NA	NA	NA	NA	NA	NA	NA	9	Cluster 1	87	Non-Surgical	12.14	78.97	22.18	0
NS	88: NS	NS-88	88	0	65.8333	FEMALE	32.5563	34.0909	74	54.1667	53.5714	55	3	2.83333	21	NA	NA	NA	NA	NA	NA	NA	NA	NA	NA	NA	NA	NA	NA	NA	NA	NA	NA	NA	NA	NA	NA	NA	NA	NA	NA	13	Cluster 1	88	Non-Surgical	5.71	101.44	35.34	0
NS	89: NS	NS-89	89	0	60.0833	FEMALE	19.4696	27.2727	95	27.0833	32.1429	20	2	4.66667	19.3333	NA	NA	NA	NA	NA	NA	NA	NA	NA	NA	NA	NA	NA	NA	NA	NA	NA	NA	NA	NA	NA	NA	NA	NA	NA	NA	7	Cluster 1	89	Non-Surgical	7.45	90.29	46.91	0
NS	98: NS	NS-98	98	0	66	MALE	23.4956	0	85	45.8333	50	40	2	8.66667	39.6667	NA	NA	NA	NA	NA	NA	NA	NA	NA	NA	NA	NA	NA	NA	NA	NA	NA	NA	NA	NA	NA	NA	NA	NA	NA	NA	0	Cluster 1	98	Non-Surgical	7.45	47.6	25.24	0
NS	99: NS	NS-99	99	0	60.6667	MALE	29.9861	11.3636	87	35.4167	39.2857	30	3	6.83333	44.3333	NA	NA	NA	NA	NA	NA	NA	NA	NA	NA	NA	NA	NA	NA	NA	NA	NA	NA	NA	NA	NA	NA	NA	NA	NA	NA	4	Cluster 1	99	Non-Surgical	9.08	58.29	24.91	0
Surgery	1: Surgery	Surgery-1	1	0	58.9167	MALE	32.1072	77.2727	0	81.25	85.7143	75	NA	NA	18	79.5455	79.5455	56.8182	56.8182	26	52	61	62	72.9167	60.7143	90	64.5833	50	85	39.5833	28.5714	55	37.5	14.2857	70	2.5	14	1.5	12	6.16667	24	8	Cluster 1	1	Surgical	31.73	24.85	59.9	1.6
Surgery	14: Surgery	Surgery-14	14	1	65.9167	FEMALE	22.71	43.1818	90	29.1667	39.2857	15	4	4.5	20	40.9091	11.3636	2.27273	2.27273	85	92	90	97	45.8333	46.4286	45	8.33333	14.2857	0	6.25	7.14286	5	10.4167	17.8571	0	4.33333	17.3333	4.3333	23.333	4.16667	26	2	Cluster 2	14	Surgical	29.37	2.32	63.75	0
Surgery	16: Surgery	Surgery-16	16	0	68.25	FEMALE	28.8369	50	90	56.25	57.1429	55	2	3.83333	15	45.4545	38.6364	25	25	80	80	90	10	39.5833	35.7143	45	47.9167	46.4286	50	35.4167	28.5714	45	43.75	35.7143	55	3	12	2.5	12.333	2.5	13	8	Cluster 1	16	Surgical	29.37	14.97	49.45	0
Surgery	17: Surgery	Surgery-17	17	0	64.0833	FEMALE	27.9641	68.1818	74	68.75	64.2857	75	2	5.83333	20	86.3636	70.4545	72.7273	34.0909	70	80	70	79	85.4167	75	100	68.75	46.4286	100	85.4167	75	100	43.75	42.8571	45	NA	NA	1.5	9	NA	NA	4	Cluster 1	17	Surgical	34	14.97	64.08	0.85
Surgery	19: Surgery	Surgery-19	19	1	55	FEMALE	35.4281	34.0909	80	62.5	64.2857	60	3	4.66667	13.3333	40.9091	13.6364	4.54545	4.54545	85	90	85	85	50	53.5714	45	20.8333	25	15	6.25	10.7143	0	14.5833	17.8571	10	5.5	30.6667	NA	NA	NA	NA	6	Cluster 2	19	Surgical	8.01	0	91.73	0
Surgery	2: Surgery	Surgery-2	2	1	53	FEMALE	41.1494	47.7273	80	66.6667	67.8571	65	NA	NA	10	43.1818	20.4545	9.09091	2.27273	87	65	84	85	60.4167	67.8571	50	39.5833	46.4286	30	16.6667	25	5	0	0	0	NA	NA	4.1667	19.333	NA	NA	4	Cluster 2	2	Surgical	11.6	0	35.66	0
Surgery	20: Surgery	Surgery-20	20	0	62.5	FEMALE	23.963	56.8182	NA	66.6667	71.4286	60	4	2.83333	7	68.1818	38.6364	NA	2.27273	90	100	NA	100	72.9167	64.2857	85	39.5833	39.2857	40	NA	NA	NA	4.16667	3.57143	5	4.5	28.6667	NA	NA	NA	NA	2	Cluster 1	20	Surgical	35.1	82.16	53.11	0.85
Surgery	22: Surgery	Surgery-22	22	1	66.4167	MALE	28.1289	63.6364	67	70.8333	71.4286	70	2	7.5	27.6667	77.2727	40.9091	NA	NA	NA	NA	NA	NA	72.9167	64.2857	85	37.5	39.2857	35	NA	NA	NA	NA	NA	NA	NA	NA	NA	NA	NA	NA	12	Cluster 2	22	Surgical	57.67	161.86	64.33	8.95
Surgery	25: Surgery	Surgery-25	25	1	51.5833	FEMALE	24.7997	63.6364	100	64.5833	57.1429	75	2	3.16667	13	86.3636	61.3636	54.5455	56.8182	85	88	98	92	89.5833	82.1429	100	77.0833	67.8571	90	56.25	53.5714	60	58.3333	53.5714	65	2.16667	8.66667	2	12.333	3.83333	19.6667	22	Cluster 2	25	Surgical	21.54	0	41.86	0
Surgery	26: Surgery	Surgery-26	26	1	59.8333	FEMALE	36.2479	43.1818	NA	43.75	39.2857	50	1	5.16667	22.3333	34.0909	36.3636	13.6364	20.4545	58	55	50	90	43.75	46.4286	40	29.1667	35.7143	20	12.5	7.14286	20	27.0833	32.1429	20	3.33333	14	5.6667	25.667	5.5	27	3	Cluster 2	26	Surgical	0	0	30.45	0.39
Surgery	27: Surgery	Surgery-27	27	1	68.1667	FEMALE	28.2892	81.8182	80	89.5833	92.8571	85	4	2.33333	12	93.1818	70.4545	54.5455	22.7273	90	70	34	46	91.6667	85.7143	100	68.75	64.2857	75	52.0833	46.4286	60	12.5	10.7143	15	1.66667	5.33333	4.6667	14.667	NA	NA	12	Cluster 2	27	Surgical	26.9	46.01	78.69	0
Surgery	28: Surgery	Surgery-28	28	1	60.9167	MALE	25.1047	20.4545	98	45.8333	60.7143	25	2	9.66667	45.3333	47.7273	29.5455	6.81818	9.09091	81	81	100	90	52.0833	67.8571	30	60.4167	64.2857	55	16.6667	25	5	29.1667	28.5714	30	5.5	38.3333	7.5	42	7.83333	44.6667	2	Cluster 2	28	Surgical	18.57	0	51.47	0
Surgery	3: Surgery	Surgery-3	3	1	53.1667	FEMALE	30.9996	72.7273	70	72.9167	67.8571	80	NA	5	20	65.9091	54.5455	11.3636	2.27273	70	80	90	38	75	82.1429	65	58.3333	53.5714	65	25	25	25	8.33333	10.7143	5	NA	24	NA	NA	NA	NA	6	Cluster 2	3	Surgical	21.54	0	43.22	0
Surgery	31: Surgery	Surgery-31	31	0	66.25	MALE	27.252	52.2727	98	60.4167	64.2857	55	3	9.33333	44	54.5455	4.54545	6.81818	NA	11	41	84	NA	54.1667	42.8571	70	16.6667	25	5	12.5	21.4286	0	NA	NA	NA	7	31.3333	7.5	37.667	8.83333	44	3	Cluster 1	31	Surgical	10.59	29.37	57.44	1.39
Surgery	32: Surgery	Surgery-32	32	1	54.25	FEMALE	21.628	56.8182	75	64.5833	67.8571	60	2	6.33333	28.3333	75	38.6364	50	36.3636	76	81	76	75	87.5	82.1429	95	54.1667	50	60	56.25	53.5714	60	39.5833	53.5714	20	4	18.6667	NA	NA	4.33333	24.6667	6	Cluster 2	32	Surgical	7.07	0	57.19	0
Surgery	33: Surgery	Surgery-33	33	1	43.3333	FEMALE	37.4193	22.7273	85	43.75	39.2857	50	2	6.33333	25.3333	45.4545	27.2727	11.3636	4.54545	10	80	73	82	75	67.8571	85	29.1667	39.2857	15	22.9167	32.1429	10	14.5833	14.2857	15	NA	NA	NA	NA	NA	NA	9	Cluster 2	33	Surgical	16.27	0	30.49	0
Surgery	34: Surgery	Surgery-34	34	1	64.4167	FEMALE	29.0718	79.5455	95	87.5	78.5714	100	3	2	5.33333	45.4545	31.8182	38.6364	15.9091	88	85	96	67	56.25	50	65	52.0833	50	55	39.5833	39.2857	40	31.25	17.8571	50	1.33333	6.66667	3.3333	16	4.5	20.3333	12	Cluster 2	34	Surgical	8.92	0	34.22	0
Surgery	37: Surgery	Surgery-37	37	1	44.5833	FEMALE	23.4154	63.6364	75	66.6667	60.7143	75	NA	2.5	6.33333	77.2727	61.3636	15.9091	NA	79	75	90	NA	79.1667	67.8571	95	62.5	60.7143	65	14.5833	14.2857	15	NA	NA	NA	NA	NA	NA	NA	NA	NA	26	Cluster 2	37	Surgical	2.13	0	40.81	0
Surgery	38: Surgery	Surgery-38	38	1	47.5	FEMALE	36.0461	43.1818	70	43.75	50	35	2	5.83333	19.6667	65.9091	34.0909	13.6364	11.3636	75	75	80	52	58.3333	53.5714	65	39.5833	42.8571	35	25	25	25	16.6667	14.2857	20	4.33333	16.6667	4.6667	22.667	5.16667	27	9	Cluster 2	38	Surgical	7.07	0	45.92	0
Surgery	39: Surgery	Surgery-39	39	1	61.9167	FEMALE	28.2892	54.5455	77	58.3333	64.2857	50	3	4.66667	18.3333	84.0909	88.6364	43.1818	NA	69	69	72	NA	89.5833	82.1429	100	87.5	78.5714	100	62.5	67.8571	55	NA	NA	NA	1.5	10.6667	5	23.667	NA	NA	13	Cluster 2	39	Surgical	18.74	0	60.39	0
Surgery	40: Surgery	Surgery-40	40	0	59.6667	FEMALE	31.6174	45.4545	84	70.8333	64.2857	80	3	3.66667	28.6667	63.6364	31.8182	25	9.09091	93	81	35	77	81.25	67.8571	100	37.5	28.5714	50	31.25	32.1429	30	22.9167	21.4286	25	3.66667	20	7.1667	33	7.5	31.3333	2	Cluster 1	40	Surgical	7.45	52.98	29.86	0
Surgery	41: Surgery	Surgery-41	41	0	56.3333	FEMALE	20.5104	86.3636	76	83.3333	82.1429	85	2	1.33333	15	79.5455	77.2727	84.0909	NA	42	42	72	94	NA	77.0833	78.5714	75	85.4167	75	100	83.3333	75	95	NA	NA	NA	1.16667	10.3333	2	12	NA	NA	8	Cluster 1	41	Surgical	7.45	63.54	29.88
Surgery	42: Surgery	Surgery-42	42	1	56	MALE	29.0525	72.7273	100	60.4167	67.8571	50	2	6.66667	26.6667	50	NA	NA	NA	90	NA	NA	NA	39.5833	32.1429	50	NA	NA	NA	NA	NA	NA	NA	NA	NA	5	19.3333	NA	NA	NA	NA	0	Cluster 2	42	Surgical	10.59	0	33.88	0
Surgery	43: Surgery	Surgery-43	43	1	75.5	FEMALE	21.6219	22.7273	70	20.8333	28.5714	10	4	4.5	22	47.7273	NA	25	29.5455	83	NA	61	69	35.4167	21.4286	55	NA	NA	NA	16.6667	7.14286	30	8.33333	10.7143	5	NA	NA	NA	NA	NA	NA	8	Cluster 2	43	Surgical	10.59	0	176.56	0
Surgery	44: Surgery	Surgery-44	44	0	60.8333	FEMALE	19.2246	75	85	75	67.8571	85	4	2	11.6667	88.6364	NA	NA	NA	70	NA	NA	NA	85.4167	75	100	NA	NA	NA	NA	NA	NA	NA	NA	NA	NA	NA	NA	NA	NA	NA	10	Cluster 1	44	Surgical	15.02	120.9	54.34	0
Surgery	45: Surgery	Surgery-45	45	0	58.0833	FEMALE	41.5323	81.8182	50	85.4167	92.8571	75	3	0.1	2	88.6364	77.2727	NA	NA	59	50	NA	NA	72.9167	53.5714	100	45.8333	42.8571	50	NA	NA	NA	NA	NA	NA	0.666667	3.33333	0.8333	4.333	NA	NA	21	Cluster 1	45	Surgical	7.45	66.14	40.6	0
Surgery	46: Surgery	Surgery-46	46	0	57.75	MALE	20.1753	65.9091	36	58.3333	60.7143	55	3	4.66667	38	NA	50	59.0909	NA	NA	56	35	NA	NA	NA	NA	60.4167	60.7143	60	56.25	60.7143	50	NA	NA	NA	3.33333	16.3333	3.3333	23	NA	NA	18	Cluster 1	46	Surgical	13.6	177.3	84.87	0
Surgery	47: Surgery	Surgery-47	47	0	65.3333	MALE	32.6361	45.4545	84	56.25	57.1429	55	4	8.5	29.3333	75	43.1818	20.4545	9.09091	71	81	87	19	60.4167	53.5714	70	41.6667	39.2857	45	22.9167	21.4286	25	2.08333	3.57143	0	2.16667	16.3333	5.6667	29.667	8.83333	28.3333	2	Cluster 1	47	Surgical	15.02	78.97	26.15	0
Surgery	48: Surgery	Surgery-48	48	1	69.25	FEMALE	23.6497	56.8182	76	50	46.4286	55	4	5	21.3333	61.3636	52.2727	61.3636	61.3636	51	78	77	63	56.25	50	65	54.1667	46.4286	65	47.9167	35.7143	65	52.0833	46.4286	60	4	22	4.8333	18.333	4.83333	23	22	Cluster 2	48	Surgical	10.36	0	96.4	0
Surgery	49: Surgery	Surgery-49	49	0	56.5	MALE	34.4361	29.5455	75	33.3333	42.8571	20	3	8.5	41.3333	65.9091	NA	36.3636	NA	80	NA	97	NA	79.1667	64.2857	100	NA	NA	NA	35.4167	42.8571	25	NA	NA	NA	NA	NA	NA	NA	NA	NA	11	Cluster 1	49	Surgical	7.45	42.13	22.38	0
Surgery	51: Surgery	Surgery-51	51	0	54.4167	FEMALE	29.7596	72.7273	72	87.5	96.4286	75	3	6.16667	27	68.1818	59.0909	29.5455	20.4545	79	84	80	85	58.3333	53.5714	65	50	42.8571	60	29.1667	17.8571	45	22.9167	17.8571	30	6.5	29.6667	6.8333	28.333	4.83333	27.6667	4	Cluster 1	51	Surgical	10.64	132.87	68.06	0
Surgery	52: Surgery	Surgery-52	52	0	67.25	FEMALE	31.8247	47.7273	62	60.4167	60.7143	60	4	3.5	10	34.0909	25	6.81818	4.54545	85	80	86	65	43.75	35.7143	55	31.25	21.4286	45	8.33333	7.14286	10	10.4167	3.57143	20	3	14.3333	4.8333	21.667	NA	NA	21	Cluster 1	52	Surgical	9.08	68.73	28.31	0
Surgery	53: Surgery	Surgery-53	53	0	43.0833	FEMALE	38.9709	52.2727	50	58.3333	53.5714	65	3	5.83333	21.3333	56.8182	47.7273	13.6364	9.09091	75	82	86	85	47.9167	42.8571	55	35.4167	28.5714	45	18.75	21.4286	15	16.6667	21.4286	10	NA	NA	NA	NA	5.33333	21	12	Cluster 1	53	Surgical	10.64	91.54	22.38	0
Surgery	55: Surgery	Surgery-55	55	1	52.5833	MALE	28.1289	47.7273	65	60.4167	64.2857	55	4	6.5	46.6667	59.0909	NA	36.3636	43.1818	70	NA	75	75	60.4167	57.1429	65	NA	NA	NA	37.5	42.8571	30	31.25	28.5714	35	NA	NA	4.46667	5.5	6	37.6667	15	Cluster 2	55	Surgical	21.54	0	67.73	0
Surgery	57: Surgery	Surgery-57	57	0	70.6667	FEMALE	34.0104	75	90	72.9167	53.5714	100	4	1	8	NA	77.2727	NA	NA	NA	92	NA	NA	NA	NA	NA	54.1667	25	95	NA	NA	NA	NA	NA	NA	NA	NA	NA	NA	NA	NA	12	Cluster 1	57	Surgical	18.04	24.31	43.87	0
Surgery	60: Surgery	Surgery-60	60	0	61.1667	FEMALE	22.6314	47.7273	70	50	50	50	4	6.16667	23	NA	NA	NA	NA	NA	NA	NA	NA	NA	NA	NA	NA	NA	NA	NA	NA	NA	NA	NA	NA	NA	NA	NA	NA	NA	NA	3	Cluster 1	60	Surgical	28.02	20.05	45.9	0
Surgery	61: Surgery	Surgery-61	61	0	65.1667	MALE	25.0879	77.2727	30	72.9167	78.5714	65	4	NA	NA	NA	NA	NA	NA	NA	NA	NA	NA	NA	NA	NA	NA	NA	NA	NA	NA	NA	NA	NA	NA	NA	NA	NA	NA	NA	NA	8	Cluster 1	61	Surgical	18.04	25.35	61.82	0
Surgery	62: Surgery	Surgery-62	62	0	77.3333	MALE	33.0876	59.0909	80	68.75	67.8571	70	4	2.66667	16.6667	NA	NA	NA	NA	NA	NA	NA	NA	NA	NA	NA	NA	NA	NA	NA	NA	NA	NA	NA	NA	NA	NA	NA	NA	NA	NA	19	Cluster 1	62	Surgical	19.57	27.39	34.2	0
Surgery	8: Surgery	Surgery-8	8	0	65.6667	MALE	25.802	9.09091	84	20.8333	28.5714	10	2	4.5	34.3333	56.8182	59.0909	18.1818	4.54545	81	90	83	100	64.5833	57.1429	75	45.8333	35.7143	60	4.16667	0	10	6.25	7.14286	5	2.33333	11.3333	5.6667	23.333	6	33.3333	4	Cluster 1	8	Surgical	48.06	46.01	72.22	4.2
[truncated: 26 more columns]
